# Supplementary material for: YBX1 Promotes Esophageal Squamous Cell Carcinoma Progression via m5C‐Dependent SMOX mRNA Stabilization
Source: PubMed Central journal article supplement (PMC11132058; doi:10.1002/advs.202302379), 2024-04-02
Supplement: ADVS-11-2302379-s001.pdf [file ADVS-11-2302379-s001.pdf]

## Supporting Information

for *Adv. Sci.*, DOI 10.1002/adv.202302379

YBX1 Promotes Esophageal Squamous Cell Carcinoma Progression via m5C-Dependent SMOX mRNA Stabilization

*Liwen Liu, Yu Chen, Tao Zhang, Guangying Cui, Weiwei Wang, Guizhen Zhang, Jianhao Li, Yize Zhang, Yun Wang, Yawen Zou, Zhigang Ren\*, Wenhua Xue\* and Ranran Sun\**

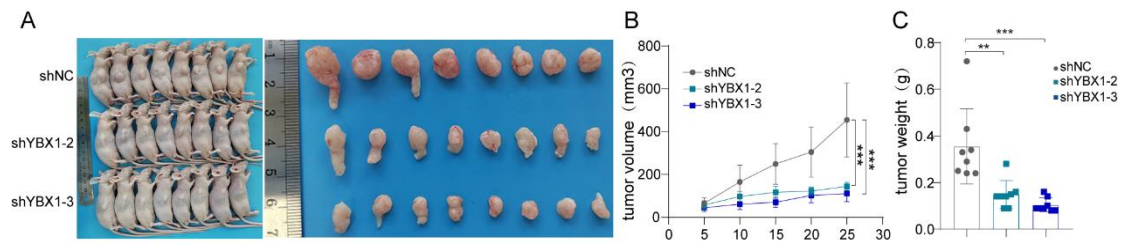

**Figure S1.** YBX1 facilitates xenograft tumor growth of ESCC in vivo. A) Morphological pictures of the decreased subcutaneous xenograft tumor formation in mice injected with YBX1-depleted KYSE410 cells. B-C) Tumor volume growth curves and final tumor weight were measured and quantified. \*\* $P < 0.01$ , and \*\*\* $P < 0.001$ .

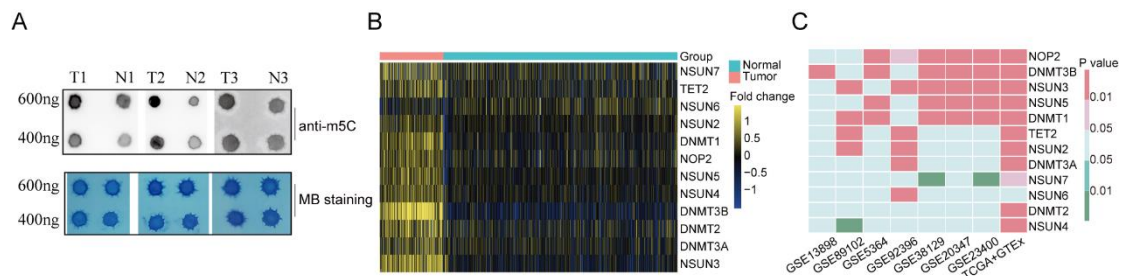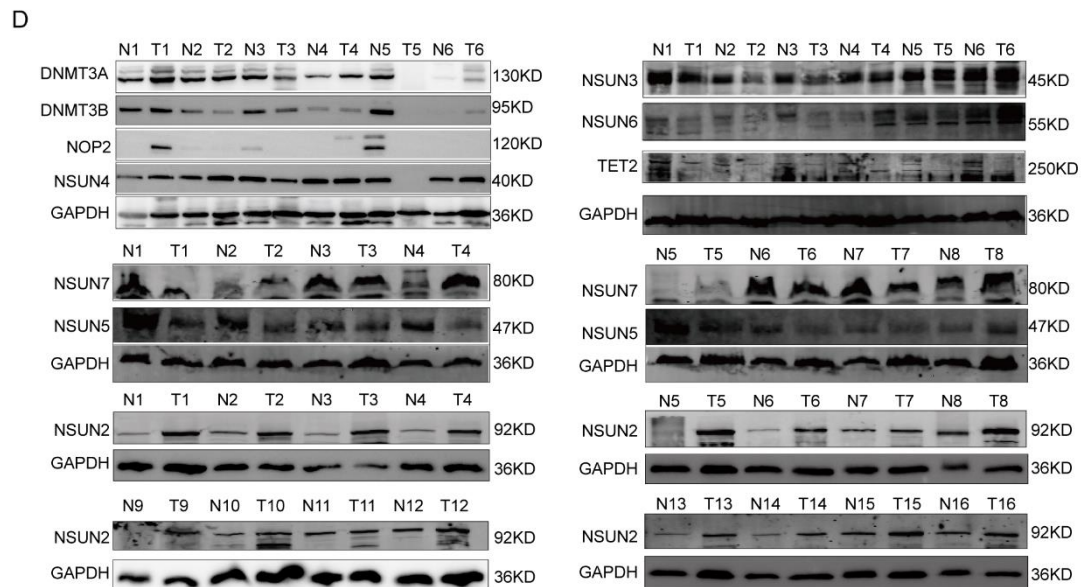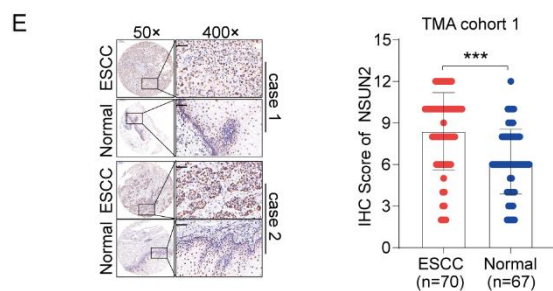

**Figure S2.** NSUN2 was remarkably upregulated in ESCC. A) The m5C level in ESCC tissues and adjacent nontumor tissues was detected by dot blot. B-C) Differentially expressed genes of the known m5C methyltransferases in TCGA, GTEx, and GEO database. D) Western blot assay to determine the expression level of m5C methyltransferases and demethylases in ESCC tissues. E) Representative IHC images of NSUN2 in ESCC tissues and adjacent normal tissue (left). IHC staining data of NSUN2 in ESCC tissues and normal tissue was quantified (right). \*\*\* $P < 0.001$ .

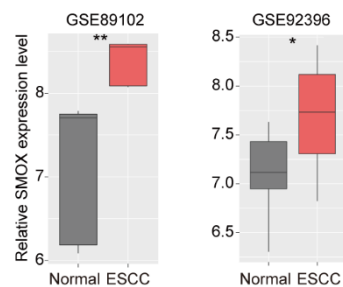

**Figure S3.** The mRNA expression level of SMOX was validated in GEO datasets.

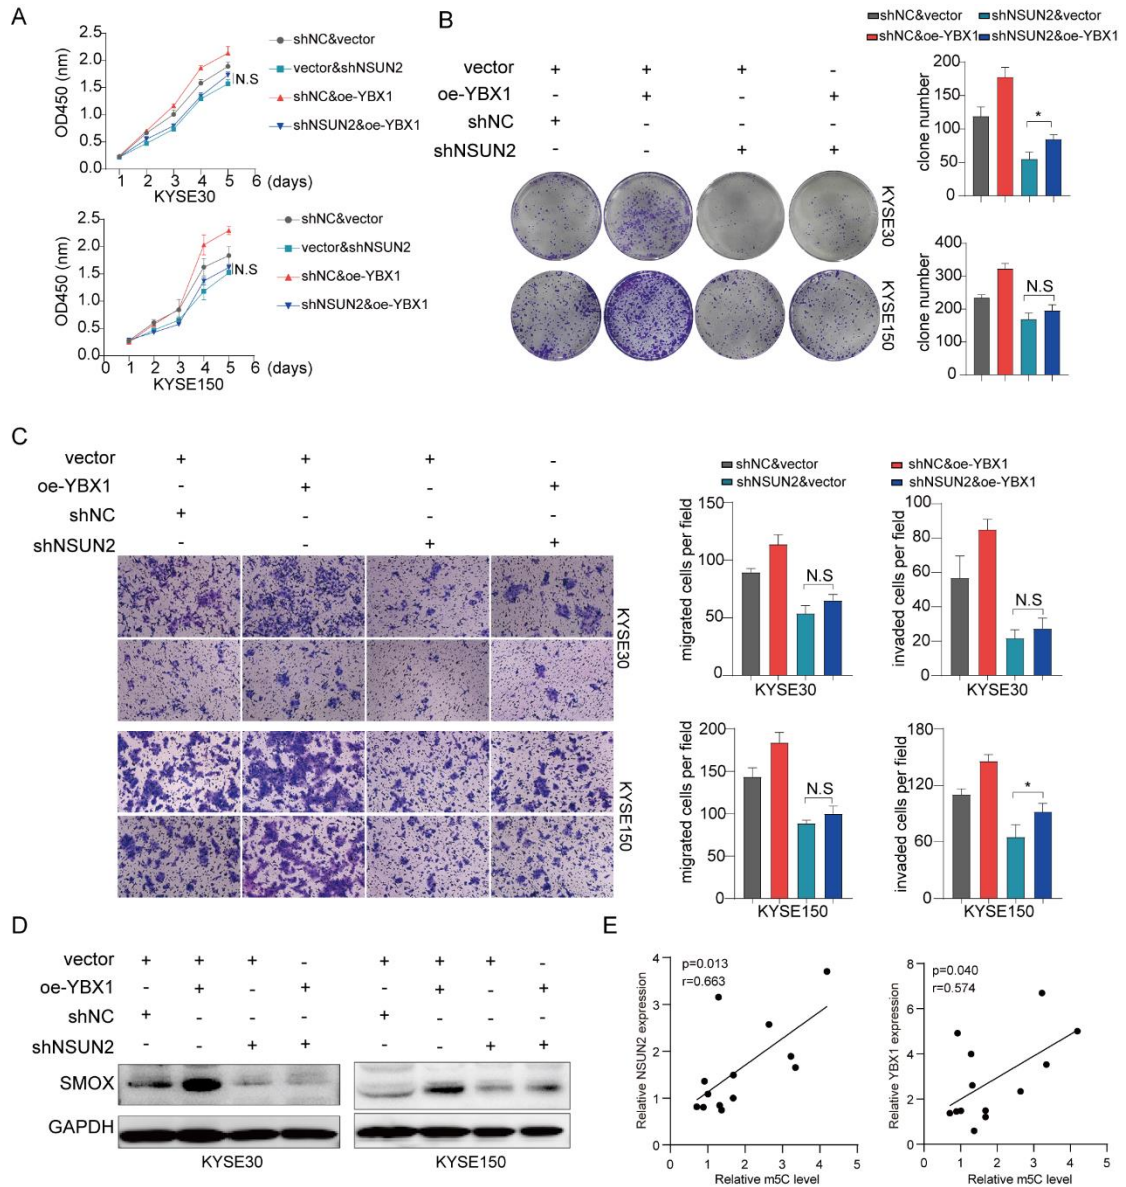

**Figure S4.** NSUN2 facilitates YBX1-mediated ESCC cell proliferation, migration, and invasion. A-B) The proliferation ability of ESCC cells co-transfected with blank vector & sh-NC, vector & shNSUN2, shNC & oe-YBX1, or shNSUN2 & oe-YBX1 was determined via CCK-8 and colony formation assays. C) Transwell assay of ESCC cells co-transfected with blank vector & sh-NC, vector & shNSUN2, shNC & oe-YBX1, or shNSUN2 & oe-YBX1. D) The expression level of SMOX was detected by western blot assay. E) Correlation analysis between the m5C RNA modification levels and the expression levels of YBX1/NSUN2. \* $P < 0.05$ .



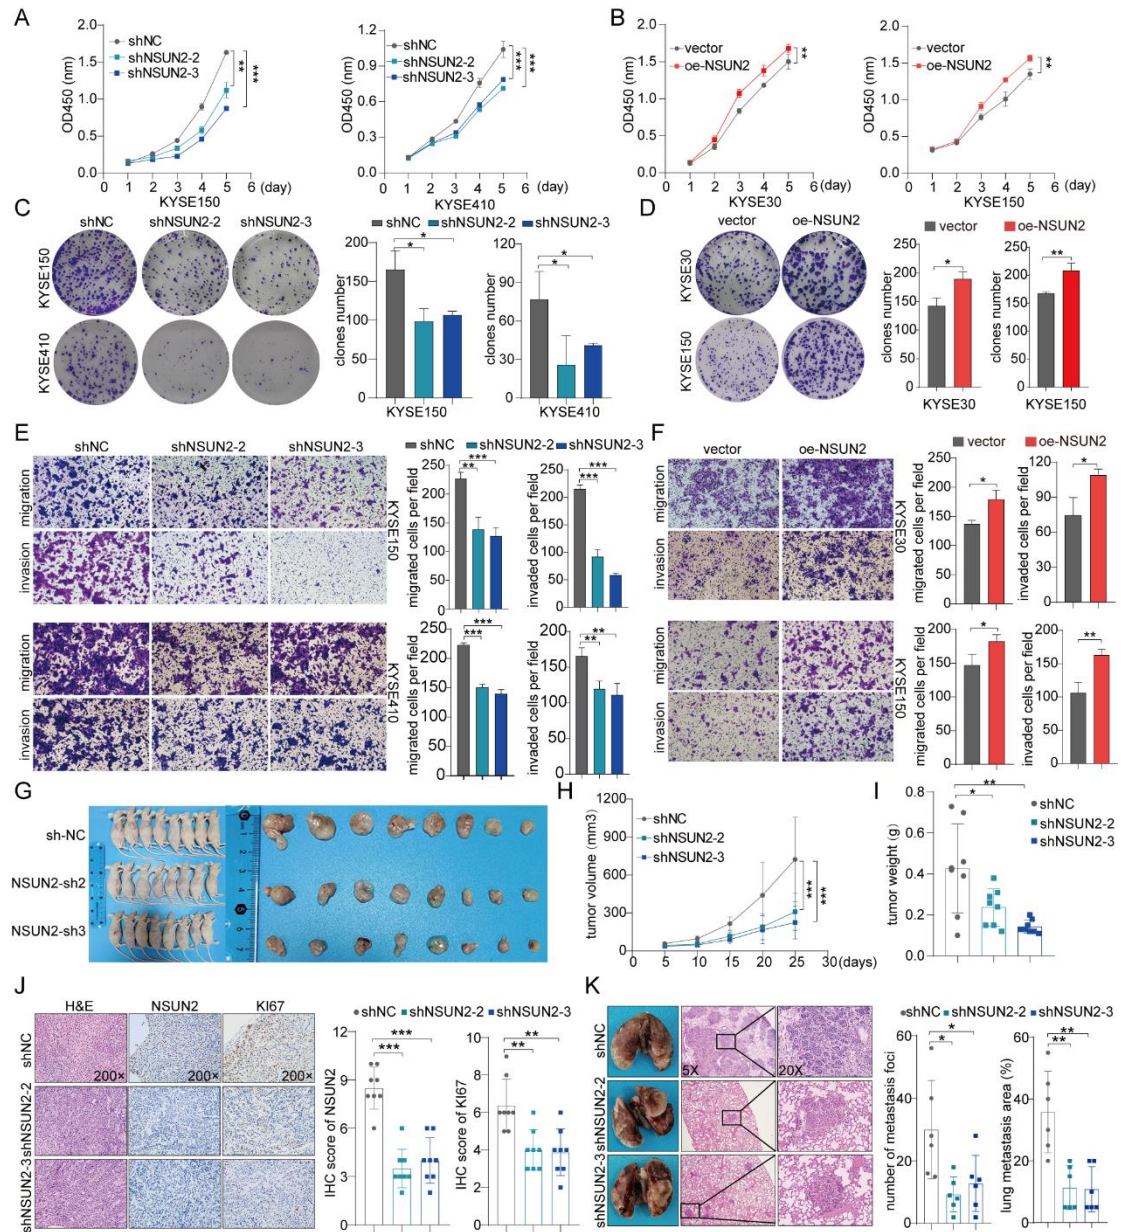

**Figure S5.** NSUN2 facilitates ESCC growth and metastasis both in vitro and in vivo.

A-D) The proliferation ability of ESCC cells with NSUN2 silencing or overexpression was assessed by CCK-8 and colony formation assays. E-F) Representative images of transwell assay with ESCC cells under NSUN2 silencing and overexpression (left). The migrated and invaded cells are displayed in the right panel. G) Morphological images of reduced subcutaneous xenograft tumor formation

in mice injected with NSUN2-deficient KYSE150 cells. H-I) Tumor growth curves and tumor weight were measured and quantified. J) Representative H&E and IHC staining images of the tumor described (left). IHC staining data of NSUN2 and KI67 of the mice in each group quantified (right). K) Representative images illustrating the general observation of lungs with metastatic nodules, along with corresponding H&E images of the tumor edges in lungs, are presented on the left. The metastatic lung nodules were quantified on the right. Data was reported as mean  $\pm$  standard deviation (SD). \* $P < 0.05$ , \*\* $P < 0.01$ , and \*\*\* $P < 0.001$ .

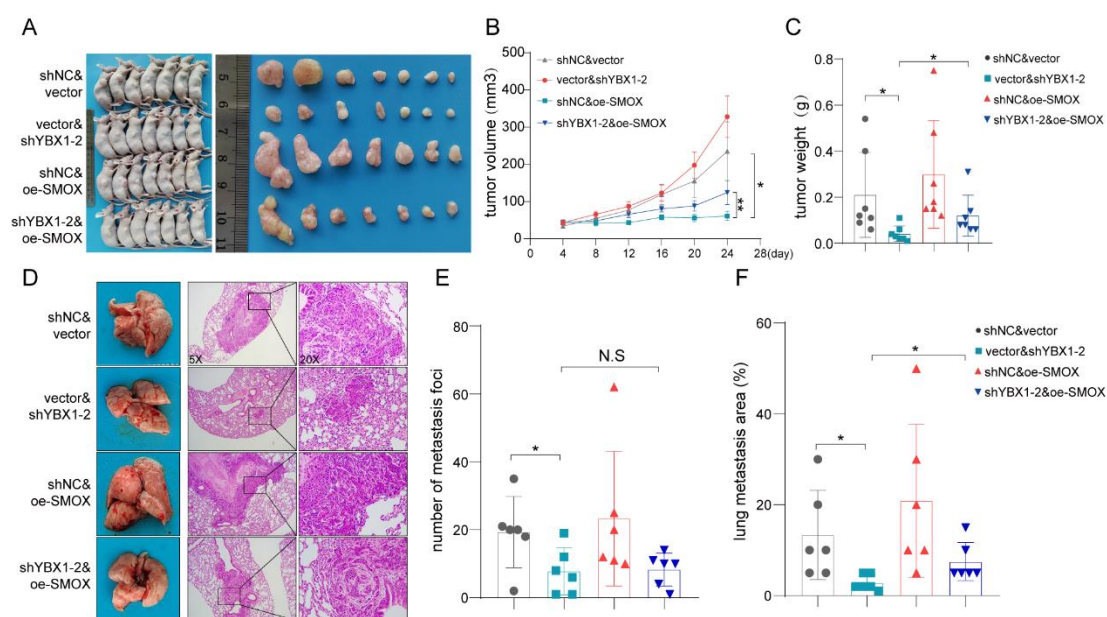

**Figure S6.** Reconstitution of SMOX partially recovered the proliferation and metastasis ability of ESCC cells curbed by YBX1 knockdown. A) Morphological pictures of the subcutaneous xenograft tumor formation in mice injected with ESCC cells co-transfected with blank vector & sh-NC, vector & shYBX1-2, shNC & oe-SMOX, or shYBX1-2 & oe-SMOX. B-C) Tumor volume growth curves and final

tumor weight were measured and quantified. D) Representative images of the overall observation of lungs with metastatic nodules and their corresponding H&E images. E-F) Lung metastasis nodules were further quantified. N.S not significant. \*P < 0.05, and \*\*P < 0.01.

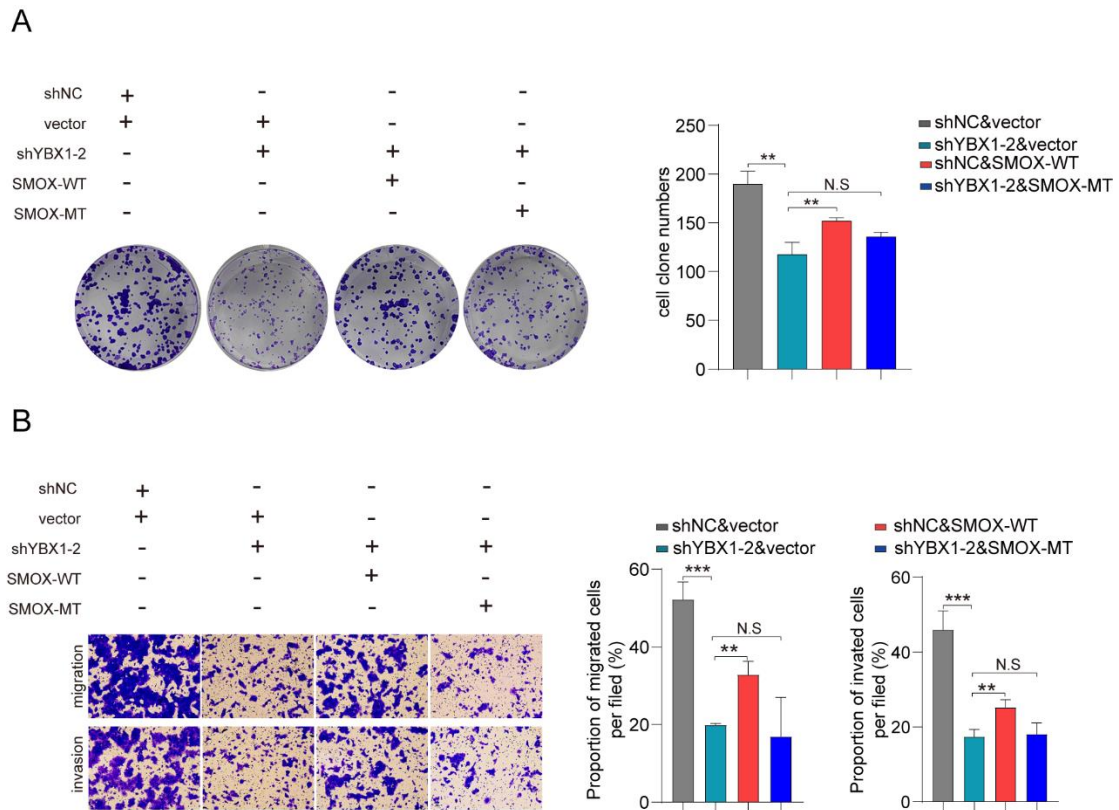

**Figure S7.** Reconstitution of SMOX-WT but not SMOX-MT could partially recover the proliferation (A) and metastasis (B) ability of ESCC cells curbed by YBX1 knockdown. \*\*P < 0.01, and \*\*\*P < 0.001.

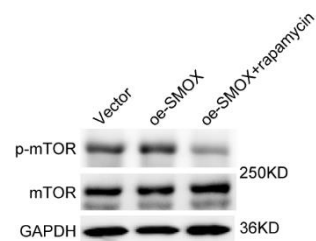

**Figure S8.** Overexpression of SMOX induced high level of p-mTOR could be inhibited by rapamycin.

**Table S1 Clinico-pathological characteristics of ESCC patients**

| Clinico-pathological characters | Number. of cases (n) | YBX1 expression |      | $X^2$ | <i>P Value</i> |
|---------------------------------|----------------------|-----------------|------|-------|----------------|
|                                 |                      | Low             | High |       |                |
| Age (years)                     | ≤60                  | 30              | 18   | 0.189 | 0.664          |
|                                 | >60                  | 77              | 32   |       |                |
| Gender                          | Male                 | 82              | 37   | 2.949 | 0.086          |
|                                 | Female               | 26              | 13   |       |                |
| Tumor size                      | T1-2                 | 20              | 11   | 0.797 | 0.372          |
|                                 | T3-4                 | 82              | 36   |       |                |
| Node                            | N0                   | 35              | 17   | 0.507 | 0.476          |
|                                 | N1-2                 | 42              | 17   |       |                |
| TNM stage                       | Stage I-II           | 49              | 24   | 0.212 | 0.645          |
|                                 | Stage III-IV         | 54              | 24   |       |                |

**Table S2 GEO microarray data enrolled in this study**

| Accession number | Platform   | Number of samples |      | Country   | Years |
|------------------|------------|-------------------|------|-----------|-------|
|                  |            | Non-tumor         | ESCC |           |       |
| GSE5364          | Affymetrix | 13                | 16   | Singapore | 2018  |
| GSE20347         | Affymetrix | 17                | 17   | USA       | 2018  |
| GSE23400         | Affymetrix | 104               | 104  | USA       | 2019  |
| GSE38129         | Affymetrix | 30                | 30   | USA       | 2018  |
| GSE92396         | Affymetrix | 9                 | 12   | USA       | 2018  |
| GSE89102         | Agilent    | 5                 | 5    | China     | 2016  |
| GSE13898         | Illumina   | 28                | 64   | USA       | 2011  |
| Total            |            | 206               | 248  |           |       |



**Table S3 Information on antibodies used in this study**

| <b>Antibody</b>  | <b>IHC</b> | <b>Western blot</b> | <b>Specificity</b> | <b>Company</b> |
|------------------|------------|---------------------|--------------------|----------------|
| YBX1             | 1:200      | 1:1000              | Rabbit             | Abcam          |
| NSUN2            | 1:200      | 1:4000              | Rabbit             | Proteintech    |
| SMOX             | 1:200      | 1:1000              | Rabbit             | Proteintech    |
| GAPDH            | /          | 1:5000              | Mouse              | Proteintech    |
| NOP2             | /          | 1:1000              | Rabbit             | Proteintech    |
| NSUN3            | /          | 1:1000              | Rabbit             | Abclonal       |
| NSUN4            | /          | 1:1000              | Rabbit             | Abclonal       |
| NSUN5            | /          | 1:1000              | Rabbit             | Abclonal       |
| NSUN6            | /          | 1:1000              | Rabbit             | Proteintech    |
| NSUN7            | /          | 1:800               | Rabbit             | Proteintech    |
| DNMT3A           | /          | 1:5000              | Rabbit             | Proteintech    |
| TET2             | /          | 1:1000              | Rabbit             | Proteintech    |
| $\beta$ -catenin | /          | 1:5000              | Rabbit             | Proteintech    |
| MMP1             | /          | 1:1000              | Rabbit             | Proteintech    |
| MMP2             | /          | 1:800               | Rabbit             | Abcam          |
| AKT              | /          | 1:1000              | Mouse              | Proteintech    |
| P-AKT            | /          | 1:1000              | Mouse              | Proteintech    |
| mTOR             | /          | 1:1000              | Mouse              | Proteintech    |
| p-mTOR           | /          | 1:1000              | Mouse              | Proteintech    |

|          |   |        |        |             |
|----------|---|--------|--------|-------------|
| P70S6K   | / | 1:1000 | Mouse  | Proteintech |
| P-P70S6K | / | 1:1000 | Rabbit | Proteintech |

---

**Table S4 Primer sequences used in this study**

| Gene name    |         | Primer sequences             |
|--------------|---------|------------------------------|
| <i>SMOX</i>  | Forward | 5'-GGCGACCACAATCACGACACTG-3' |
|              | Reverse | 5'- ACCACCGACCACTGCTCATCC-3' |
| <i>GAPDH</i> | Forward | 5'- GAACGGGAAGCTCACTGG -3'   |
|              | Reverse | 5'- GCCTGCTTCACCACCTTCT -3'  |
